144. Lumbar JE: A controller of the tongue and palate during general anesthesia. *J Am Med Assoc* 1915; 64:1757
145. Fink BR: Roentgenographic studies of the oropharyngeal airway. *ANESTHESIOLOGY* 1957; 18:711–8
146. Kaye G, Orton RH, Renton DG: *Anaesthetic methods*. Melbourne, Australia, Ramsey (Surgical) PTY, Ltd., 1946, pp. 90–2
147. Adriani J: *Techniques and Procedures of Anesthesia*. Springfield, Illinois, Charles C. Thomas Publisher, 1947, pp. 104–11
148. Ross JS, Fairlie HP: *Handbook of Anaesthetics*, 4th edition. Baltimore, William Wood and Company, 1935, pp. 28–36
149. Kreiselman J: A new resuscitation apparatus. *ANESTHESIOLOGY* 1943; 4:608–11
150. Featherstone PJ, Ball CM: Bellows and self-inflating bags. *Anaesth Intensive Care* 2017; 45:135–7
151. Fahey DG: The self-inflating resuscitator: Evolution of an idea. *Anaesth Intensive Care* 2010; 38(suppl 1):10–5
152. Ruben H, Ruben A: Apparatus for resuscitation and suction. *Lancet* 1957; 273:373–4
153. Offer A: Body weight and self-control in the United States and Britain since the 1950s. *Soc Hist Med* 2001; 14:79–106
154. Mushin W: Manufacturers: More information please. *Survey Anesthesiol* 1958; 2:433–4 (Editorial: The anaesthetist and his equipment. *Br J Anaesth* 1958; 30:553–4)
155. Rendell-Baker L: From something old something new. *ANESTHESIOLOGY* 2000; 92:913–8
156. Hogan K: Malignant hypercompliance. *ANESTHESIOLOGY* 2017; 126:759–62

## ANESTHESIOLOGY REFLECTIONS FROM THE WOOD LIBRARY-MUSEUM

### Crimean Thornapple Depicted by Liebig's Extract of Meat Company

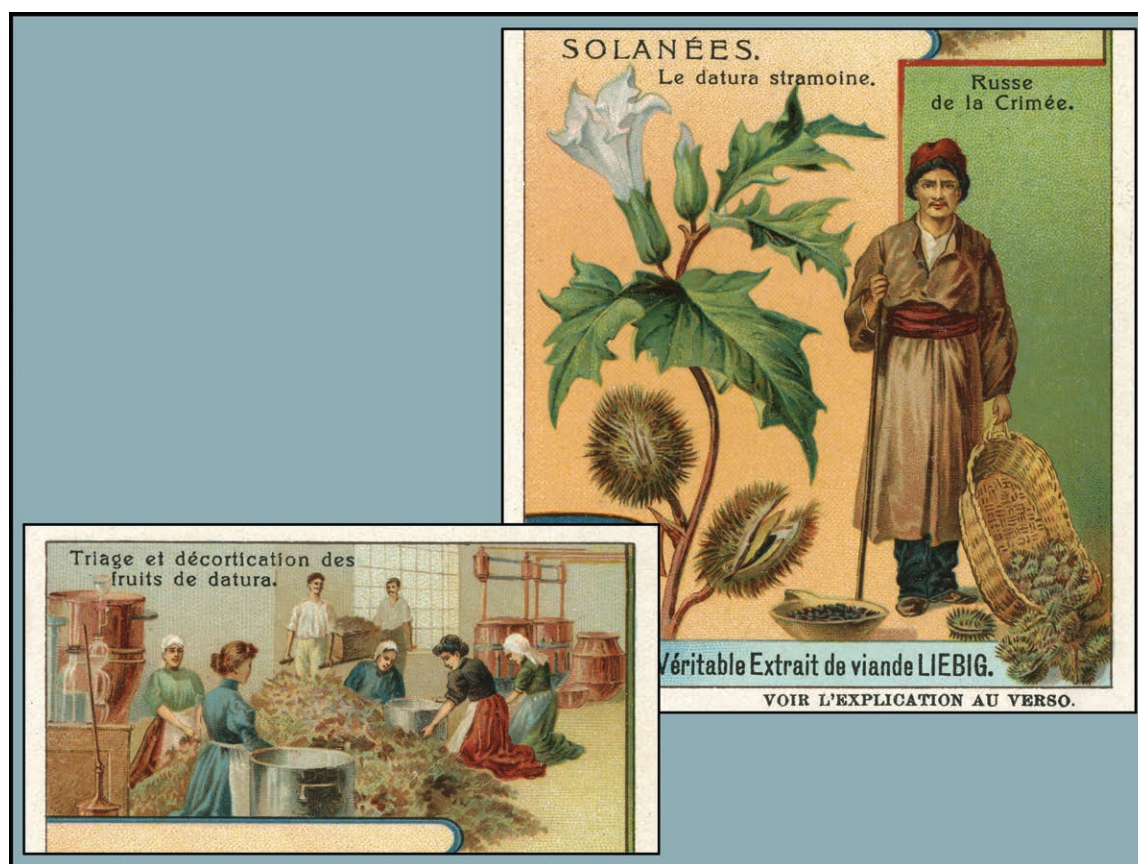

These images are from the French language version of the trade card distributed by the Liebig Company, which was famous for both producing beef extract and being named after Professor Justus von Liebig, one of chloroform's discoverers. Relying on the coasts of the Black and Caspian Seas as sources for *Datura stramonium*, the Liebig Company depicted a Crimean Russian peasant spilling out a basket (upper right) of harvested thornapple fruits. Collected fruits were sorted and decorticated at the Liebig factory (lower left), where a powerful anticholinergic slurry of scopolamine, hyoscyamine, and atropine could be extracted for pharmaceutical purposes. (Copyright © the American Society of Anesthesiologists' Wood Library-Museum of Anesthesiology.)

George S. Bause, M.D., M.P.H., Honorary Curator and Laureate of the History of Anesthesia, Wood Library-Museum of Anesthesiology, Schaumburg, Illinois, and Clinical Associate Professor, Case Western Reserve University, Cleveland, Ohio. UJYC@aol.com.
